# Supplementary material for: The TRPA1 Agonist Cinnamaldehyde Induces the Secretion of HCO3− by the Porcine Colon
Source: Int J Mol Sci. 2021 May 14;22(10):5198. doi: 10.3390/ijms22105198 (PMC8156935; doi:10.3390/ijms22105198)
Supplement: Supplementary file 1 [file ijms-22-05198-s001.zip]

Archive with 8 entries (8 files):
- 20210513_Supplementary_Materials.pdf
- Figure1 .png
- Figure2.png
- Figure3.png
- Figure4.png
- Figure5.png
- Figure6.png
- Figure7.png
